# Supplementary material
Source: PubMed Central journal article supplement (PMC2908047)

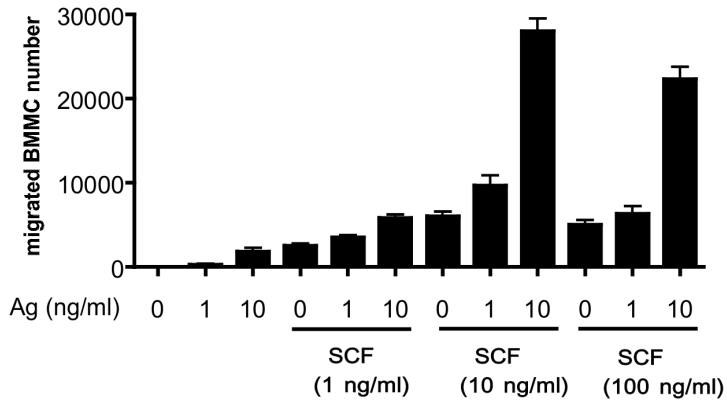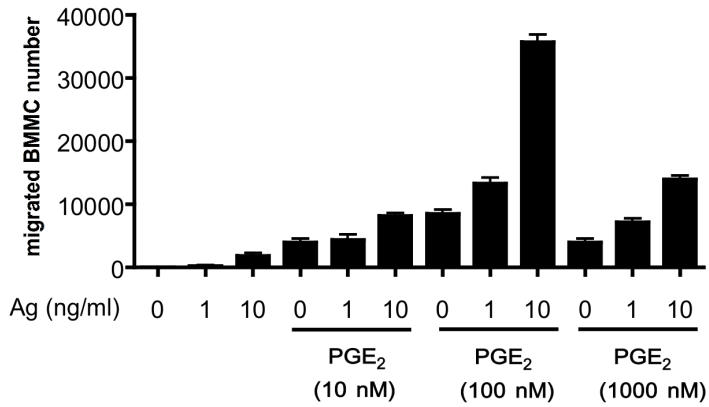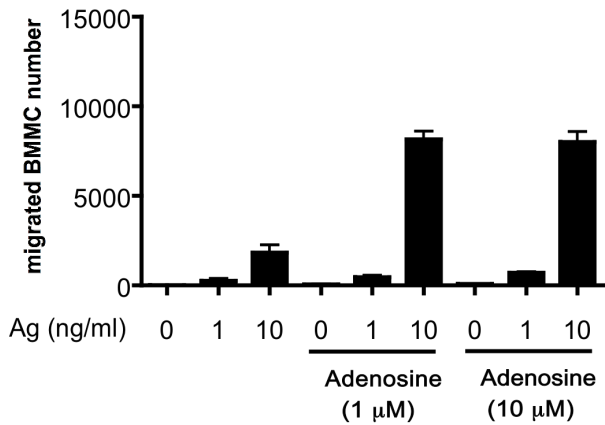

Supplement: jcs.071043_1.pdf [file jcs.071043_1.pdf]
